1 **Title:**

2 **Feature-specific prediction errors for visual mismatch**

3 **Abbreviated title:**

4 **Feature-specific prediction errors for visual mismatch**

5 Gabor Stefanics <sup>a,b</sup>, Klaas Enno Stephan <sup>a,b,c</sup>, Jakob Heinzle <sup>a</sup>

6 <sup>a</sup> Translational Neuromodeling Unit (TNU), Institute for Biomedical Engineering, University of Zurich &  
7 ETH Zurich, Wilfriedstrasse 6, 8032 Zurich, Switzerland

8 <sup>b</sup> Laboratory for Social and Neural Systems Research, Department of Economics, University of Zurich,  
9 Blümlisalpstrasse 10, 8006 Zurich, Switzerland

10 <sup>c</sup> Max Planck Institute for Metabolism Research, Cologne, Germany

11

12 **Corresponding author:**

13 Gabor Stefanics. Address: Translational Neuromodeling Unit (TNU), Institute for Biomedical Engineering,  
14 University of Zurich & ETH Zurich, Wilfriedstrasse 6, 8032 Zurich, Switzerland. Tel.: +41 (0) 44 634 9121,  
15 email: [stefanics@biomed.ee.ethz.ch](mailto:stefanics@biomed.ee.ethz.ch)

16

17 **Number of pages: 18**

18 **Number of figures: 5, tables: 1. Color should NOT be used for any figures in print**

19 **Number of words for Abstract: 229**

20 **Declaration of interest: none.**

21

22 **Acknowledgements:**

23 We acknowledge support by the University of Zurich (KES), the René and Susanne Braginsky Foundation  
24 (KES), and the Clinical Research Priority Program “Multiple Sclerosis” (GS, KES).

25

26 **Abstract**

27 Predictive coding (PC) theory posits that our brain employs a predictive model of the environment to infer  
28 the causes of its sensory inputs. A fundamental but untested prediction of this theory is that the same  
29 stimulus should elicit distinct precision weighted prediction errors (pwPEs) when different (feature-  
30 specific) predictions are violated, even in the absence of attention. Here, we tested this hypothesis using  
31 functional magnetic resonance imaging (fMRI) and a multi-feature roving visual mismatch paradigm  
32 where rare changes in either color (red, green), or emotional expression (happy, fearful) of faces elicited  
33 pwPE responses in human participants. Using a computational model of learning and inference, we  
34 simulated pwPE and prediction trajectories of a Bayes-optimal observer and used these to analyze  
35 changes in blood oxygen level dependent (BOLD) responses to changes in color and emotional expression  
36 of faces while participants engaged in a distractor task. Controlling for visual attention by eye-tracking,  
37 we found pwPE responses to unexpected color changes in the fusiform gyrus. Conversely, unexpected  
38 changes of facial emotions elicited pwPE responses in cortico-thalamo-cerebellar structures associated  
39 with emotion and theory of mind processing. Predictions pertaining to emotions activated fusiform,  
40 occipital and temporal areas. Our results are consistent with a general role of PC across perception, from  
41 low-level to complex and socially relevant object features, and suggest that monitoring of the social  
42 environment occurs continuously and automatically, even in the absence of attention.

43

44 **Keywords:** predictive coding; precision weighted prediction error; color perception; emotion recognition;  
45 perception; perceptual inference

46

47 **Highlights**

48 Changes in color or emotion of physically identical faces elicit prediction errors

49 Prediction errors to such different features arise in distinct neuronal circuits

50 Predictions pertaining to emotions are represented in multiple cortical areas

51 Feature-specific prediction errors support predictive coding theories of perception

52

## 53 **Introduction**

54 Predictive coding (PC) postulates that perceptual inference rests on probabilistic (generative) models of  
55 the causes of the sensory input (Rao and Ballard, 1999; Friston, 2005; Clark, 2015). The theory emphasizes  
56 the active nature of perceptual inference: in contrast to theories that view perception as a reactive, feed-  
57 forward analysis of bottom-up sensory information (Hubel and Wiesel, 1965; Riesenhuber and Poggio,  
58 2000), PC regards the brain as actively predicting the sensory signal, based on a hierarchical probabilistic  
59 model of the causes of its sensory signals (Egner et al., 2010; Friston, 2010; Lochmann et al., 2012; Bogacz,  
60 2017). According to this theory, perception involves inferring the most likely cause of the sensory signals  
61 by integrating incoming sensory information at a given level in the hierarchy with predictions generated  
62 at the level above (Rao and Ballard, 1999; Lee and Mumford, 2003; Friston, 2005), where the latter derive  
63 from prior information. In this framework a unified perceptual representation of an object involves a set  
64 of hierarchical predictions that relate to the object's different attributes, such as spatiotemporal  
65 coordinates but also intrinsic structure. At each hierarchical level, incoming signals from the level below  
66 are compared to predictions from the level above, and the ensuing prediction errors (PEs) are passed to  
67 the higher level in order to update predictions.

68 PC thus offers a framework to describe how object representations emerge during hierarchical perceptual  
69 inference: segregation and integration of predicted lower-level and more abstract attributes take place in  
70 a probabilistic network bound together by passing messages between hierarchical levels that most  
71 effectively minimize perceptual PEs (Friston, 2005; Bogacz, 2017). In this framework, unexpected stimuli  
72 trigger PE responses which subside as stimuli become predictable, for example through repeated  
73 presentation.

74 PC has become one of the most influential theories of perception, and many of its implications have been  
75 confirmed experimentally (e.g., Smith and Muckli, 2010; Wacongne et al., 2011; Kok et al., 2012a,b;  
76 Durschmid et al., 2016; Sedley et al., 2016; Ehinger et al., 2017; Gordon et al., 2017; Schwiedrzik and  
77 Freiwald, 2017). One central question about the implementation of PC is whether the same physical  
78 stimulus elicits separable feature-specific PE responses when distinct predictions about its various  
79 attributes exist, regardless whether such attributes are behaviorally relevant. To our knowledge, this has  
80 only been studied under attention (Jiang et al., 2016), but not for automatic processing, in the absence of  
81 attention and task-relevance. To answer this question, we used a roving standard paradigm (Fig.1A) to  
82 systematically manipulate predictions of two attributes of complex stimuli, the color and emotional  
83 expression of faces. Based on prior event-related brain potential (ERP) studies, we used a visual mismatch  
84 paradigm (for reviews, see Stefanics et al., 2014; Kremlacek et al., 2016) to study brain responses  
85 reflecting PEs and model updating processes elicited by unexpected changes in color and facial emotion  
86 while participants engaged in a distractor task.

87 We used the Hierarchical Gaussian Filter (HGF, Mathys et al., 2011; Mathys et al., 2014) to simulate belief  
88 trajectories of an ideal Bayesian observer. The HGF is a computational model that allows for inferring an  
89 agent's beliefs and uncertainty about hidden states of the world that generate sensory information. The  
90 model tracks the beliefs of the agent about the probability of each stimulus feature and updates its  
91 inference as new information is presented trial-by-trial. The HGF implements a form of PC in the temporal

92 domain and has been used in multiple studies to investigate predictive processes in the brain (e.g., Iglesias  
93 et al., 2013; Schwartenbeck et al., 2015; Vossel et al., 2015; Auzztulewicz et al., 2017; Diaconescu et al.,  
94 2017; Lawson et al., 2017; Powers et al., 2017; Adams et al., 2018; Katthagen et al., 2018; Stefanics et al.,  
95 2018a).

96 In this paper we used a similar experimental paradigm, computational modeling and analysis approach as  
97 in a previous single-trial EEG study that allowed us to study the time course of event-related brain  
98 potentials (ERP) to unexpected color and emotion changes associated with pwPEs (Stefanics et al., 2018a).  
99 In this previous study, we found that both kind of changes elicited brain responses that were better  
100 explained with pwPEs as parametric regressors than regressors encoding categorical stimulus changes in  
101 a general linear modeling (GLM) analysis. Here, we used fMRI to identify the brain regions associated with  
102 feature-specific predictions and pwPEs to human faces. Critically, our paradigm independently  
103 manipulated the color and emotional expression of face stimuli (Fig. 1B, C), allowing us to model  
104 predictions and pwPEs to violations of emotion expectations separately from predictions and pwPEs  
105 elicited by changes in color. This enabled us to study predictive processes pertaining to low versus high  
106 level object features for physically identical stimuli.

## 107 **Methods**

### 108 Ethics Statement

109 The experimental protocol was approved by Cantonal Ethics Commission of Zurich (KEK 2010-0327).  
110 Written informed consent was obtained from all participants after the procedures and risks were  
111 explained. The experiments were conducted in compliance with the Declaration of Helsinki.

### 112 Subjects

113 Thirty-nine healthy, right-handed subjects participated in this experiment. One subject was excluded due  
114 to incomplete data, and three subjects' data of one scanning day were lost during transfer due to a  
115 technical failure. The final sample comprised 35 subjects (mean age=23.06ys, sd=3.02ys, 15 females). All  
116 subjects had normal or corrected-to-normal vision.

### 117 Paradigm

118 Faces were presented in four peripheral quadrants of the screen (Fig. 1A) on a grey background with a  
119 fixation cross in the center. Each stimulus panel contained four faces of different identity expressing the  
120 same emotion. Stimulus duration was 200ms. The stimuli were presented after an inter-stimulus interval  
121 of 550ms during which only the fixation cross was present. A change detection task was presented at the  
122 central fixation cross. Roving paradigms have frequently been used to study automatic sensory  
123 expectation effects (Haenschel et al., 2005; Garrido et al., 2008; Costa-Faidella et al., 2011; Moran et al.,  
124 2013; Auzztulewicz and Friston, 2015; Stefanics et al., 2018a,b). Here, we used a factorially structured  
125 multi-feature visual 'roving standard' paradigm to elicit PE responses by unexpected changes either in  
126 color (red, green), or emotional expression (happy, fearful) of human faces, or both. Importantly, this  
127 allowed us to study how brain responses to physically identical stimuli differed, depending on the degree

128 of expectations about color and emotion, respectively. A diagram of the transitions between stimulus  
 129 types is shown in Fig. 1B.

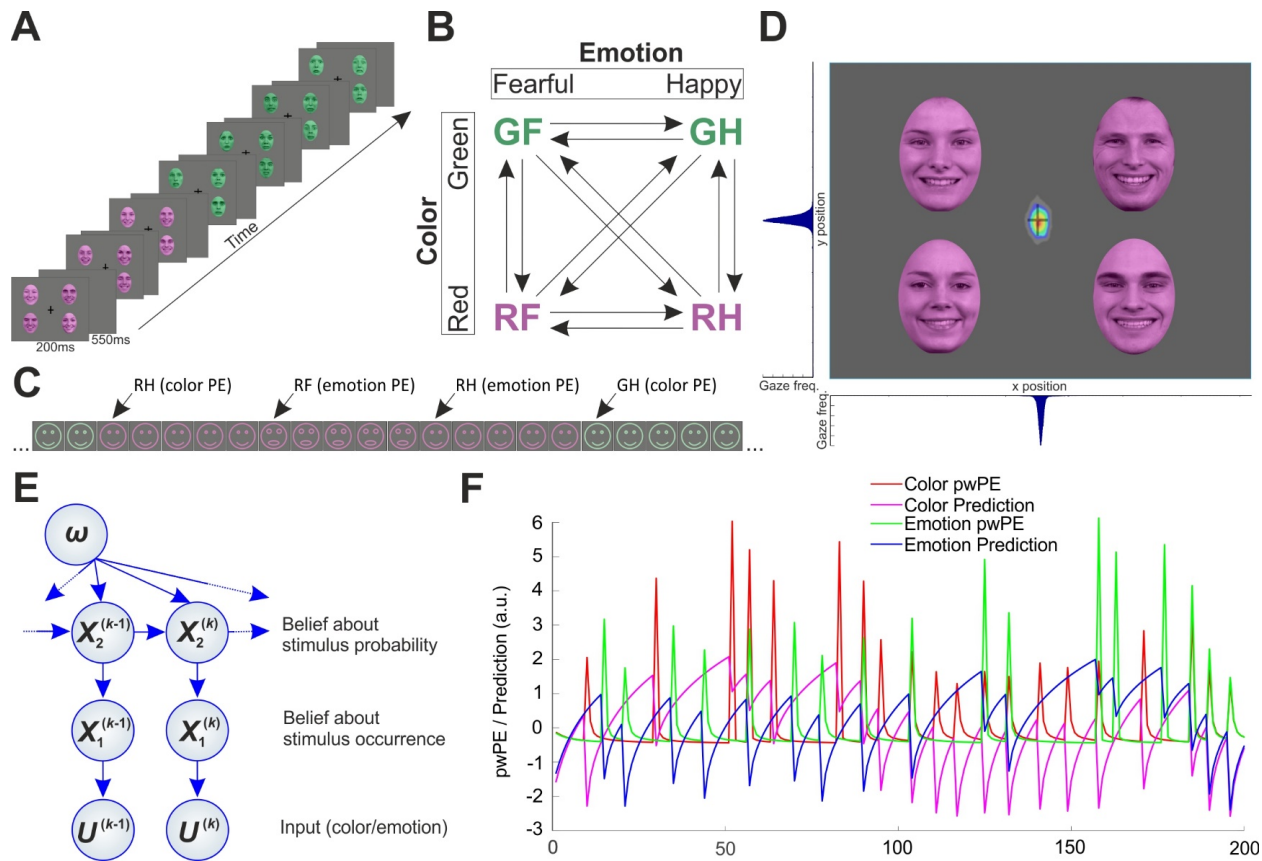

130

131 **Fig. 1. Experimental design and eye-tracking results.** A) Four individual photographs of the same color displaying the same  
 132 facial affect were presented in each stimulus panel for 200ms in a roving standard paradigm. Each panel was followed by an  
 133 empty grey screen presented for 550ms. The vertical and horizontal lines of the fixation cross occasionally flipped during this  
 134 interstimulus interval. The subjects' task was to press a button when the cross flipped. B) Schematic contingency table showing  
 135 the four equally probable stimulus types (GF: green fearful, GH: green happy, RF: red fearful, RH: red happy faces). After 5-9  
 136 presentations each stimulus type was followed by any of the other three types. Arrows indicate transitions with equal overall  
 137 probability between stimulus types during the experiment. C) Schematic illustration of a stimulus sequence showing  
 138 transitions between stimulus types. Note physically identical stimuli evoking different PEs depending on expectations  
 139 established by prior stimulus context. D) Heatmap of normalized gaze position frequency overlaid on a stimulus panel. Warmer  
 140 colors represent more frequent gaze position. Normalized histograms below and left to the heatmap show the same data  
 141 projected onto the x and y axis, respectively. Faces were reproduced with permission of the Radboud Faces Database  
 142 ([www.rafd.nl](http://www.rafd.nl)). E) A graphical model of the Hierarchical Gaussian Filter with two levels. F) Model-based pwPE trajectories from  
 143 one experimental block used as regressors in the GLM.

144 Images were taken from the Radboud Faces Database (Langner et al., 2010). Ten female and ten male  
 145 Caucasian models were selected based on their high percentage of agreement on emotion categorization  
 146 (98% for happy, 92% for fearful faces). A Wilcoxon rank sum test indicated that categorization agreement  
 147 on the emotional expressions did not differ between happy and fearful faces ( $Z=-0.63$ ,  $p=0.53$ ). To control  
 148 low-level image properties, we equated the luminance and the spatial frequency content of grayscale

149 images of the selected happy and fearful faces using the SHINE toolbox (Willenbockel et al., 2010). The  
150 resulting images were used to create the colored stimuli.

### 151 Behavioral task

152 Similar to previous studies (e.g., Astikainen et al., 2009; Kimura et al., 2012; Müller et al., 2010; Stefanics  
153 et al., 2011, 2012, 2018a,b; Kreegipuu et al., 2013; Kuldkepp et al., 2013; Kovács-Bálint et al., 2014; Farkas  
154 et al., 2015) we used a behavioral task to engage participants' attention and thus reduce attentional  
155 effects on the processing of face stimuli across participants. The task involved detecting changes in the  
156 length of the horizontal and vertical lines of a fixation cross presented in the center of the visual field. At  
157 random times, the cross became wider or longer (Fig. 1A), at a rate of 8 flips per minute on average. The  
158 cross-flips were unrelated to the changes of the unattended faces. The task was to quickly respond to the  
159 cross-flips with a right hand button-press. Reaction times were recorded.

### 160 Eye-tracking

161 Participants were explicitly asked to fixate at the cross in the center of the screen. To make sure that  
162 participants did not direct their overt attention to the face stimuli, we used an Eyelink 1000 eye-tracking  
163 system to record gaze position at 250 Hz during the experiment. After removal of intervals immediately  
164 before and after, as well as during blinks, heatmap of x-y data points for all subjects were plotted using  
165 the EyeMMV toolbox (Krassanakis et al., 2014). A Gaussian filter (SD=3 pixels) was applied to smooth the  
166 final image. The heatmap was normalized to have maximum value of 1, and gaze position histograms for  
167 x and y coordinates were plotted (Fig.1D).

### 168 Data acquisition and preprocessing

169 fMRI data was acquired on a Philips Achieva 3 Tesla scanner using an eight channel head-coil (Philips,  
170 Best, The Netherlands) at the Laboratory for Social and Neural Systems Research at the University of  
171 Zurich. A structural image was acquired for each participant with a T1-weighted MPRAGE sequence: 181  
172 sagittal slices, field of view (FOV): 256 × 256 mm<sup>2</sup>, Matrix: 256 × 256, resulting in 1 mm<sup>3</sup> resolution.  
173 Functional imaging data was acquired in six experimental blocks. In each block 200 whole-brain images  
174 were acquired using a T2\*-weighted echo-planar imaging sequence with the following parameters. 42  
175 ascending transverse plane slices with continuous in-plane acquisition (slice thickness: 2.5 mm; in-plane  
176 resolution: 3.125 × 3.125 mm; inter-slice gap: 0.6 mm; TR = 2.451 ms; TE = 30 ms; flip angle = 77; field of  
177 view = 220 × 220 × 130 mm; SENSE factor = 1.5; EPI factor = 51). We used a 2nd order pencil-beam  
178 shimming procedure provided by Philips to reduce field inhomogeneities during the functional scans. All  
179 functional images were reconstructed with 3 mm isotropic resolution. Functional data acquisition lasted  
180 approximately 1 hour. During fMRI data acquisition, respiratory and cardiac activity was recorded using a  
181 breathing belt and an electrocardiogram, respectively.

182 We used statistical parametric mapping (SPM12, v6470; RRID: SCR\_007037; Friston et al., 2007) for fMRI  
183 data analysis. First, functional images were slice time corrected, realigned to correct for motion and co-  
184 registered with the subject's own anatomical image. Next, we normalized structural images to MNI space  
185 using the unified segmentation approach and applied the same warping to normalize functional images.

186 The functional images were smoothed with a 6 mm full-width at half maximum Gaussian kernel and  
187 resampled to 2 mm isotropic resolution. We used RETROICOR (Glover et al., 2000) as implemented in the  
188 PhysIO-Toolbox (Kasper et al., 2017) from the open source software TAPAS  
189 (<http://www.translationalneuromodeling.org/tapas>) to create confound regressors for cardiac pulsations,  
190 respiration, and cardio-respiratory interactions. These confound regressors were entered into the general  
191 linear model (GLM; see below). The data and code used in this study are available from the corresponding  
192 author, upon reasonable request.

193

### 194 Modeling belief trajectories

195 In order to include parametric regressors of precision weighted prediction errors (pwPE) in the GLM, we  
196 simulated trajectories of belief update in a generative model of perceptual inference, the Hierarchical  
197 Gaussian Filter (HGF; Mathys et al., 2011; 2014). We followed the approach described in details in  
198 Stefanics et al. (2018a) using the HGF toolbox version v2.2 contained in TAPAS  
199 (<http://www.translationalneuromodeling.org/tapas>). Briefly, we simulated the perceptual model of a  
200 two-level HGF for the input traces given by the two features of the face stimuli: color (red vs. green) and  
201 emotion (fearful vs. happy). Inversion of the HGF (Fig. 1E) infers the hidden states ( $x$ ) of the world that  
202 generate the sensory input ( $u$ ). The belief states are updated after each trial following a generic update  
203 rule: The posterior mean  $\mu_2^{(k)}$  of state  $x_2$  at trial  $k$  changes its value according to a precision-weighted PE  
204  $\varepsilon_2^{(k)}$ , where the precision-weighting changes trial by trial and can be regarded as dynamic learning rate:

$$205 \quad \mu_2^{(k)} - \mu_2^{(k-1)} \propto \varepsilon_2^{(k)} \quad (1)$$

206 Note that the sigmoid transform of the tendency  $\mu_2^{(k-1)}$  constitutes the prediction (probability of  
207 observing an input 1 on trial  $k$ ), while  $\mu_2^{(k)}$  is the tendency after it was updated according to the input on  
208 trial  $k$ . Here, we refer to  $\mu_2^{(k)}$  as prediction. For comparison, classical associative and reinforcement  
209 learning models (e.g., Rescorla and Wagner, 1972) follow a similar form but use a fixed learning rate:

$$210 \quad \text{prediction}^{(k)} = \text{prediction}^{(k-1)} + \text{learning rate} \times \text{PE} \quad (2)$$

211 For the simulations we assumed that color and emotion were processed by two separate, independent  
212 HGFs. However, we considered an interaction between color and emotion PEs within a GLM. Investigating  
213 possible interactions at the level of the perceptual model of the HGF would require establishing a novel  
214 version of the HGF that incorporates interactions between hidden beliefs, which was beyond the scope of  
215 our current study. We estimated the parameters of the model assuming an ideal Bayes-optimal observer  
216 (Mathys et al., 2011) that minimizes surprise of the incoming input stream. Figure 1F displays example  
217 traces of the absolute value of  $\mu_2$  and  $\varepsilon_2$  which entered the GLM as described below.

### 218 General linear model analysis

219 The fMRI data was analyzed with two separate GLMs. One GLM included the gradually changing (absolute)  
220 pwPEs and “prediction strength” given by the absolute value of  $\mu_2$  derived from the HGF as modulatory

221 regressors while the other GLM incorporated a regressor representing categorical stimulus change. The  
222 latter served for comparison, implementing a simpler alternative than PC, i.e., change detection (CD; see  
223 Lieder et al., 2013). For the GLM based on the CD model, we included stick functions as parametric  
224 modulators for each stimulus on those trials when a change occurred in the stimulus sequence. The GLMs  
225 were estimated for each participant individually. The pwPE and prediction strength as well as the CD  
226 modulatory regressors were computed separately for color and emotion. In addition the GLM included  
227 modulatory regressors for red vs. green and happy vs. fearful, respectively. Hence, for each run of the  
228 experiment the design matrix included the following experimental regressors: i) a main regressor for the  
229 onset of each stimulus display, ii) two modulatory regressors encoding color (red = -1, green = 1) and  
230 emotion (happy = -1, fearful = 1), respectively, and iii) two modulatory regressors with the absolute pwPE  
231 (or CD) for color and emotion, and iv) two modulatory regressors with the absolute value of the tendency  
232 ( $|\mu_2|$ ) for color and emotion (only, in the case of the HGF based model). The modulatory regressors were  
233 mean centered and normalized to unit variance. In addition to these regressors of interest, button presses  
234 to cross-flips of the visual attention task were also included in the model. All regressors were convolved  
235 with a canonical hemodynamic response function (HRF). Movement regressors and physiological  
236 confounds were included in the first level GLM (Kasper et al., 2017) which was estimated for each  
237 participant individually. Please note that the sign of colors and emotions in ii) was arbitrarily chosen.  
238 Finally, in order to assess whether there was any interaction between color and emotion PEs, we fitted an  
239 additional GLM, where we included the Hadamard (element-wise) product of the color and emotion pwPE  
240 as an additional regressor.

241 On the group level, we used F-tests to find regions whose response showed significant correlation with  
242 pwPE or stick regressors. The resulting statistical parametric maps (SPM) were family-wise error (FWE)  
243 corrected at the cluster level ( $p < 0.05$ ) with a cluster defining threshold (CDT) of  $p < 0.001$  (Woo et al., 2014;  
244 Flandin and Friston, 2017). We used probabilistic anatomical labels and cytoarchitectonic maps in the SPM  
245 Anatomy toolbox (v2.2c; RRID: SCR\_013273, Eickhoff et al., 2005) to identify the anatomical  
246 areas/structures where we observed significant effects. We summarize activations in terms of anatomical  
247 labeling by reporting all local maxima within each cluster in Table 1. This provides an overview over the  
248 activations in terms of commonly used anatomical labels.

## 249 **Results**

### 250 Fixation and behavioral responses

251 Gaze position data (Fig. 1D) confirmed that participants complied with task instructions and fixated the  
252 central fixation cross throughout the task. Thus, participants engaged in the detection task and were not  
253 overtly attending the faces. Mean reaction time to cross-flips was 484ms (standard deviation:  
254  $SD = 106.9$ ms), and mean hit rate was 78% ( $SD = 7.34$ %).

### 255 First-level GLMs

256 We fitted two GLMs on the single-subject level, incorporating parametric regressors that represented two  
257 hypotheses about the decay of pwPE/prediction responses following a change in color of emotional  
258 expression of the faces. Similar to the model comparison procedure described in our previous study, our



259 original aim was to create a functionally defined mask of significant voxels showing PE responses under  
260 both models at the group level (Stefanics et al., 2018a). However, while similar activation clusters were  
261 obtained using the pwPE/prediction and CD regressors to color changes, significant clusters to changes in  
262 emotion were only found using the pwPE/prediction regressors. In other words, the beta estimates  
263 obtained using CD were not consistent enough across subjects to yield significant activation clusters at  
264 the group level. The lack of significant group-level results for the CD regressors prevented us from creating  
265 an unbiased mask comprising significant voxels for color and emotion (“logical AND” conjunction).  
266 Furthermore, the additional analysis which included the interaction (product) of color and emotion pwPE  
267 did not reveal any evidence for an interaction between the two. We thus restrict ourselves to reporting  
268 the results obtained at the group-level analysis using the HGF-based pwPE/prediction model.

### 269 Effect of color pwPE

270 A whole-brain analysis of color changes showed significant activation for color pwPE in fusiform areas (Fig.  
271 2A). Post hoc inspection of the contrast estimates (Fig. 2B) revealed an increased response to pwPE.  
272 Predictions pertaining to color did not yield significant activations. Detailed information about anatomical  
273 labels, cluster size, and MNI coordinates for the maxima of significant voxel clusters are listed in Table 1.

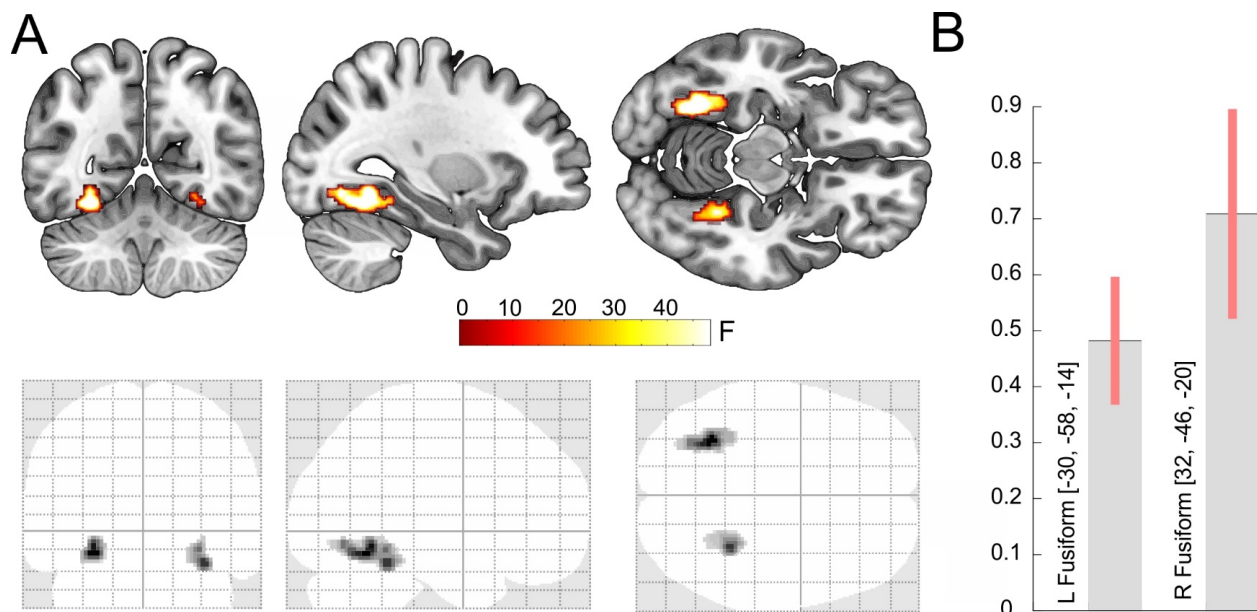

274  
275 **Fig. 2. Effect of color pwPE. A) Top:** Activation map ( $p < 0.05$  cluster-level whole-brain FWE corrected, with a CDT of  $p < 0.001$ )  
276 overlaid onto the MNI152 standard-space T1-weighted average structural template. Slices show activation in the left fusiform  
277 gyrus (MNI-coordinates: [-30 -58 -14]). Bottom: Glass brain showing the results of the F-test. B) Contrast estimates (arbitrary  
278 units) for color pwPEs in the left and right fusiform gyri. Bars indicate 90% C.I.

### 279 Effect of emotion prediction and pwPE

280 A whole-brain analysis of emotion PEs showed significant effects in bilateral cerebellum, cuneus, lingual  
281 gyrus, precuneus, thalamus, and right supramarginal gyrus (extending into superior and middle temporal  
282 gyrus) as well as right posterior medial frontal cortex (Fig. 3A).

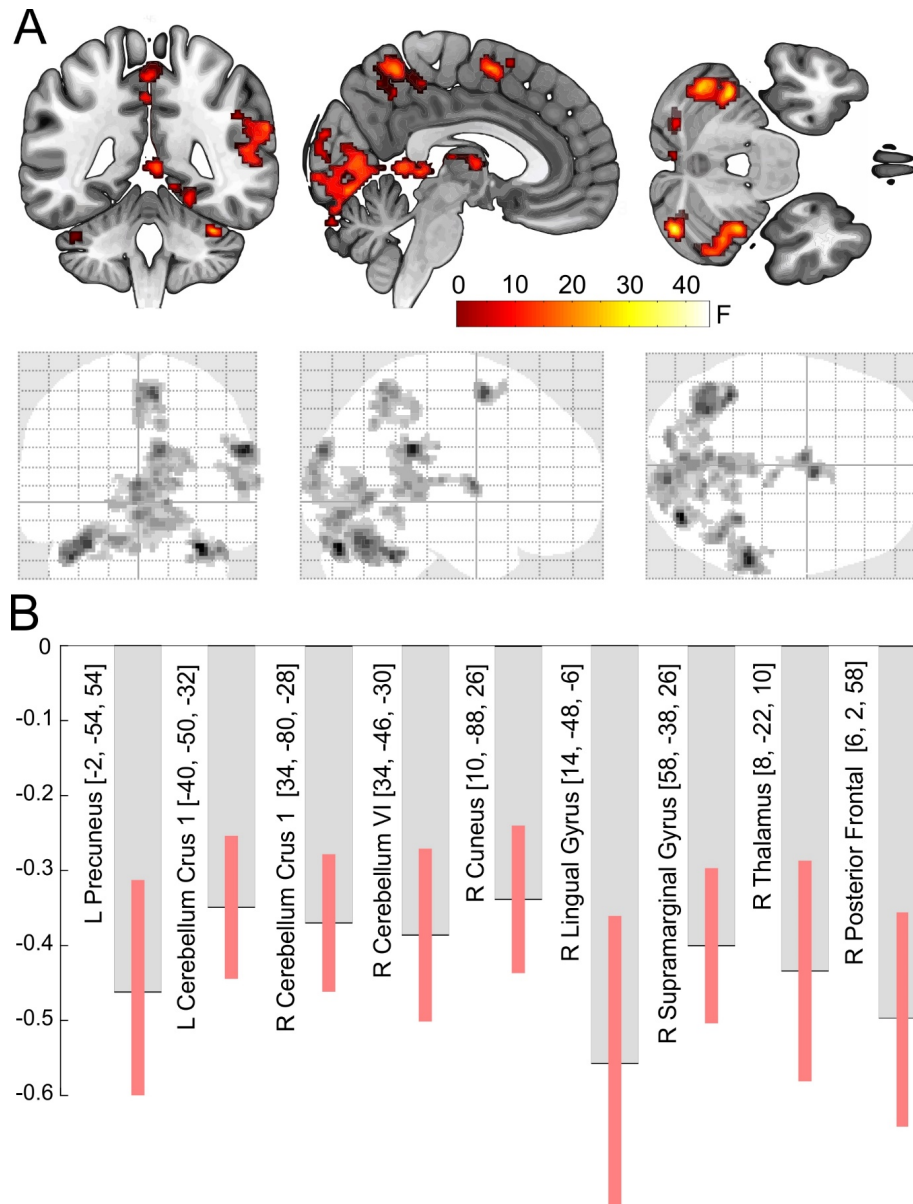

283

284 **Fig. 3. Main effect of emotion pwPE. A) Top:** Activation map ( $p < 0.05$  cluster-level whole-brain FWE corrected, with a CDT of  
285  $p < 0.001$ ) overlaid onto the MNI152 standard-space T1-weighted average structural template. Slices show activations at  
286 coordinates [4, -45, -31] cutting through the right anterior precuneus. Bottom: Glass brain showing the results of the F-test  
287 (whole-brain FWE cluster-level corrected at  $p < 0.05$ , with a cluster-defining threshold of  $p < 0.001$ ). B) Contrast estimates  
288 (arbitrary units) for the emotion pwPEs in the left and right cerebellum, left precuneus, right cuneus, lingual and supramarginal  
289 gyrus, thalamus, and posterior frontal cortex. Bars indicate 90% C.I. Note that bar plots are shown for illustration only.  
290 Statistical significance was assessed at the whole-brain level described above.

291

292 We found significant activations pertaining to emotion predictions in three cortical clusters: two in  
293 bilateral fusiform gyri (extending into lingual gyri) and one in right the superior and middle temporal  
294 cortex (Fig. 4A). A post hoc analysis of the contrast estimates in these regions revealed that all areas  
295 showed a negative effect of emotion pwPEs (Fig. 3B) and predictions (Fig. 4B).

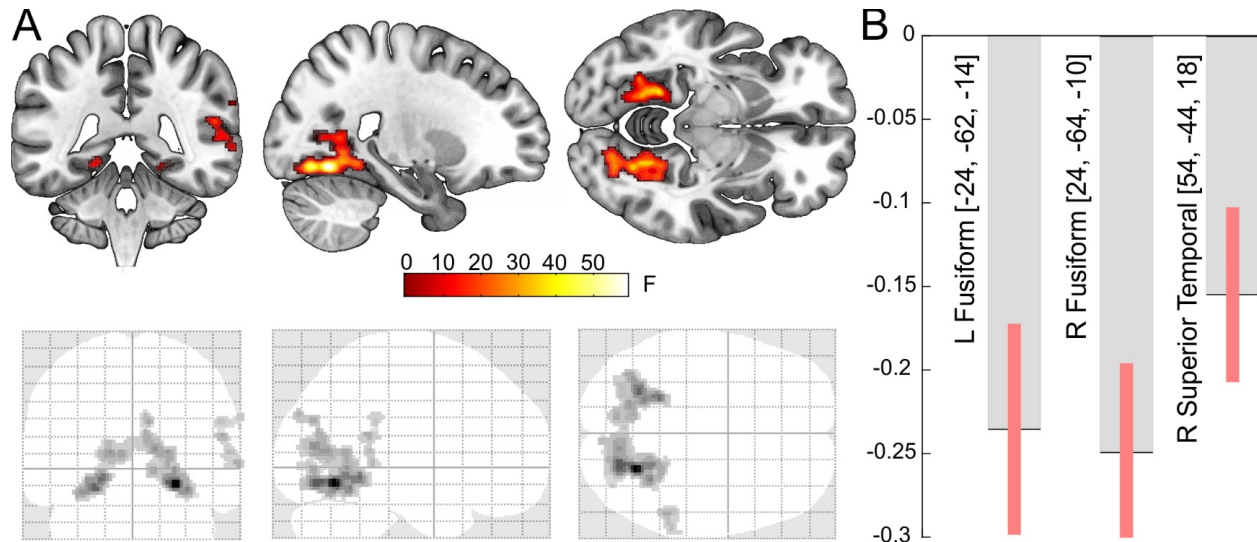

296

297 **Fig. 4. Main effect of emotion prediction.** A) Top: Activation map ( $p < 0.05$  cluster-level whole-brain FWE corrected, with a CDT of  $p < 0.001$ ) overlaid onto the MNI152 standard-space T1-weighted average structural template. Slices show activations at coordinates [24, -42, -8] cutting through the right fusiform gyrus. Bottom: Glass brain showing the results of the F-test (whole-brain FWE cluster-level corrected at  $p < 0.05$ , with a cluster-defining threshold of  $p < 0.001$ ). B) Contrast estimates (arbitrary units) for the emotion prediction in the left and right fusiform gyrus, and right superior temporal gyrus. Bars indicate 90% C.I. Note that bar plots are shown for illustration only. Statistical significance was assessed at the whole-brain level described above.

304

## 305 Discussion

306 We used the Hierarchical Gaussian Filter, a computational model for learning and inference, to simulate belief trajectories of an ideal Bayesian observer presented with a sequence of face stimuli. The trial by trial update of internal hidden belief states in the HGF relies on precision weighted prediction errors. Traces of predictions and pwPEs pertaining to color and emotional expression of faces served as regressors in a GLM which yielded brain structures where activation showed a significant relationship to those computational quantities. We manipulated sensory expectations towards color and emotional expression of faces independently. Crucially, emotion and color pwPEs/predictions were evoked by physically identical stimuli; only the specific expectation (statistical regularity) that was violated on any given trial, differed between the two conditions. While our previous EEG study reported the scalp distribution and time-course of pwPE responses (Stefanics et al., 2018a), here we used fMRI to find BOLD correlates of pwPEs and predictions in generator structures. We found BOLD correlates of pwPEs to color changes in bilateral fusiform gyrus, whereas pwPEs to changes of emotional expressions activated a different set of areas including the bilateral cerebellum, lingual gyrus, precuneus, thalamus, and right supramarginal gyrus as well as right posterior medial frontal cortex. We observed activations pertaining to emotion predictions in bilateral fusiform and the right supramarginal gyrus (Fig. 5A).

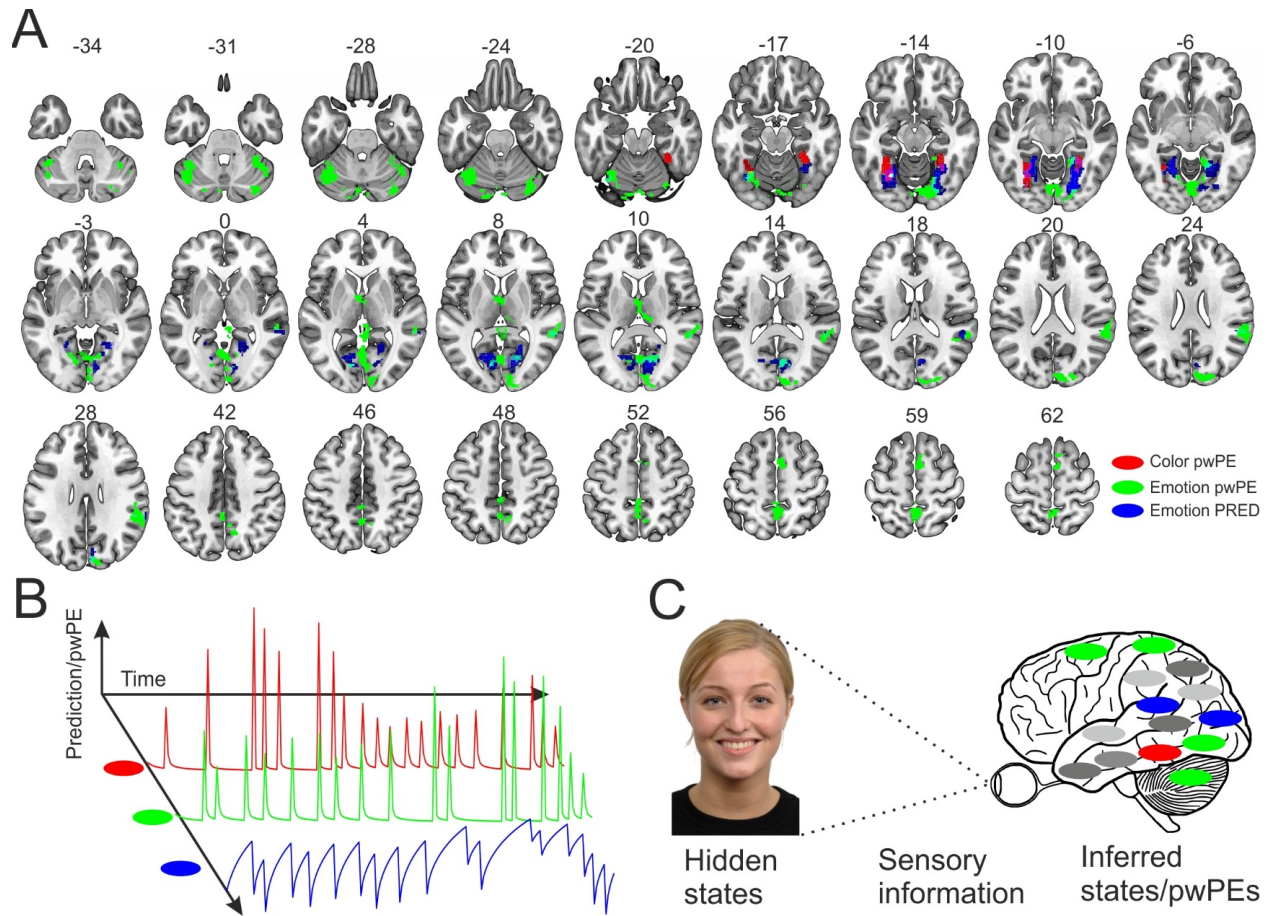

321

322 **Fig. 5. Overview of the results and PC framework for perceptual prediction errors. A) Colored areas mark main**  
323 **clusters related to color pwPEs (red), and emotion pwPEs (green). Note the dissociation of PEs for color and**  
324 **emotion changes. B) pwPE- and prediction-related activations for different sensory features arise and are**  
325 **updated, respectively, during Bayesian inference as properties of the hidden states that cause the sensory**  
326 **information dynamically change over time. Prediction and pwPEs to color and emotion are marked as in A),**  
327 **additional features are marked with grey. C) Schematic depicting functional segregation in the nervous system, as**  
328 **distinct features of the world are inferred and predicted by distinct neural structures specializing in the given**  
329 **features. Image of a model used in our study reproduced with permission of the Radboud Faces Database (Langner**  
330 **et al., 2010).**

331

332 According to recent hierarchical formulations of PC (Friston, 2005), creating and maintaining our internal  
333 model of the world is a process during which predictive object representations about the likely properties  
334 of the hidden objects are updated using precision-weighted PEs (e.g., Moran et al., 2013; Stefanics et al.,  
335 2018a) that signals mismatch between the expectations based on prior information and the current  
336 sensory data (Fig. 5B). In the present study, the demonstration of activations correlated to pwPE in ventral  
337 visual areas as well as in emotion processing structures suggests a role for PC in color and emotion  
338 perception. Importantly, we manipulated stimulus sequences to induce automatic expectations about the  
339 occurrence of different stimulus features, using the same faces to elicit distinct emotion and color pwPEs.  
340 In line with our hypothesis, color and emotion pwPEs were reflected by activity in brain structures known  
341 to be dedicated to color and emotion processing. A hypothetical generalization of our results is shown in

342 Fig. 5C, which illustrates functional segregation of inferring hidden causes of sensory information for  
343 different features, including color and emotional expression of faces.

344 Here, we studied predictions and pwPEs to unattended and task-irrelevant stimuli. We used a primary  
345 task independent of the facial stimuli to ensure that participants did not attend to the faces and verified  
346 their attentional focus by eye-tracking. Thus, predictions and pwPEs were elicited under an automatic  
347 recognition processes and minimized confounding variations in attentional contributions.

348 It is important to note that due to the lack of significant group level results for the emotion stick regressor,  
349 we were not able to directly compare models using the approach presented in Stefanics et al. (2018a).  
350 Hence, we could not use model comparison to assess whether the pwPE or the stick regressor traces  
351 provided the formally better model. Notably, the latter are equivalent to a very quick adaptation without  
352 precision weighting. However, the second level results suggest that the representation of pwPEs is more  
353 consistent across subjects, leading to a significant group effect. In addition, while we use computational  
354 quantities to model neural activity in the GLM, our method (fMRI) does not allow us to make a direct  
355 statement about the neuronal implementation, e.g., neuronal fatigue, suppressive effects in single  
356 neurons, or network effects (e.g., Solomon and Kohn; 2014, Stefanics et al., 2016). Based on the current  
357 analysis it is not possible to reject some form of adaptation (e.g., fatigue) as a potential mechanism as  
358 opposed to a more general model based on hierarchical Bayesian inference. Thus, adaptation could be an  
359 alternative explanation of our findings.

360 To our knowledge this is the first fMRI study using a Bayesian observer model to describe automatic  
361 predictions and pwPEs to violations of expectations to different features of the same objects, in the  
362 absence of focal attention and task-relevance. Both expectation based on stimulus probability and  
363 attention based on task-relevance have been suggested to modulate sensory PEs (e.g., Summerfield and  
364 de Lange, 2014; Auksztulewicz and Friston, 2015; Auksztulewicz et al., 2017). Attentional effects have  
365 been suggested to increase synaptic gain of PE coding neurons (Kok et al., 2012; Wyart et al., 2012; Jiang  
366 et al., 2013; Vossel et al., 2014; Auksztulewicz and Friston, 2015), whereas expectation effects manifest in  
367 reduced neuronal responses (Grotheer and Kovács, 2015; Auksztulewicz and Friston, 2016; Stefanics et  
368 al., 2018a,b). Recent formulations of PC suggest that attention serves to optimize precision estimates of  
369 specific PEs. By increasing the weight that is put on PEs, the role of attention is to influence subsequent  
370 inference and learning (Friston, 2009; Feldman and Friston, 2010; den Ouden et al., 2012; Parr and Friston,  
371 2018). Furthermore, a previous study also found that PEs spread across object features in the visual cortex  
372 (Jiang et al., 2016). Here, we extend these previous findings by showing that (i) pwPEs can also be elicited  
373 in spatially remote neural structures that specialize in the processing of distinct stimulus attributes and  
374 (ii) in the absence of attention. Notably, Jiang et al. (2016) studied PEs to attended and task-relevant  
375 random dot stimuli, while in our study face stimuli were task-irrelevant and not attended, as verified by  
376 eye tracking. The differences between our current and their results suggest that the role of focal attention  
377 in perception might not only be to enhance but also spread PEs across features at the object level (Jiang  
378 et al., 2016) which is in line with the feature-integration theory of attention (Treisman and Gelade, 1980).  
379 Thus, while the visual system likely represents statistical relationships across features and automatically  
380 structures them into objects (Müller et al., 2009, 2011), our results suggest that PEs to violations of specific  
381 features are processed mostly in different regions. Clusters in the cerebellum, thalamus, precuneus,

382 posterior medial frontal cortex, and right temporal areas were activated exclusively for predictions and/or  
383 pwPEs pertaining to emotions. However, activations in the fusiform gyrus for color and emotion showed  
384 some overlap (Fig. 5A). In addition, we could not find any evidence for an interaction between PEs for  
385 different features when they are task-irrelevant and unattended. However, we only considered an  
386 interaction between color and emotion PEs at the level of the GLM and did not investigate possible  
387 interactions at the level of the perceptual model of the HGF. This would require establishing a novel HGF  
388 that incorporates interactions between hidden beliefs.

### 389 Color PEs

390 Color processing involves the ventral visual pathway (Mesulam, 1998; Bartels and Zeki, 2000), where fMRI  
391 studies have shown strong color-related activations (Brewer et al., 2005; Solomon and Lennie, 2007;  
392 Barbur and Spang, 2008; Brouwer and Heeger, 2009). The location of the fusiform activation in our  
393 experiment is in agreement with “color-biased” regions in the ventral occipito-temporal cortex (Lafer-  
394 Sousa et al., 2016). To our knowledge, there have been no previous investigations of color processing from  
395 a PC-related perspective. Our results suggest the importance of pwPEs, as a putative signature of PC, for  
396 color perception.

### 397 Emotion PEs and predictions

398 Facial emotions are non-verbal acts of communication that express emotional states and intentions, and  
399 are fundamental in social interactions (Fridlund, 1994; Frith, 2009). The social environment is not  
400 constant, and detecting changes in the emotional valence of facial expressions in our social space is  
401 important for socially successful behavior. Prior ERP studies (Susac et al., 2004; Kimura et al., 2012; Li et  
402 al., 2012; Csukly et al., 2013; Stefanics et al., 2012, 2018a; Astikainen et al., 2013; Fujimura and Okanoya,  
403 2013; Xu et al., 2018) suggest that emotional expressions are processed in a few hundred milliseconds  
404 and stored in predictive memory representations. We found emotion pwPEs in a set of areas including  
405 the bilateral cerebellum, precuneus, thalamus, right lingual and supramarginal gyrus, as well as right  
406 posterior medial frontal cortex. We observed activations pertaining to emotion predictions in bilateral  
407 fusiform and the right superior temporal gyrus. Details of significant clusters are provided in Table 1. This  
408 pattern of results (Fig. 5A) is in line with the notion that emotion processing involves a mosaic-like set of  
409 affective, motor-related and sensory components (Bastiaansen et al., 2009). More specifically, it  
410 demonstrates pwPE/prediction activations in areas that previous work identified as activated by the  
411 processing of emotional faces (Fusar-Poli et al., 2009; E et al., 2014; Adamaszek et al., 2017) and theory  
412 of mind tasks, in particular the Mind in the Eyes task (Schurz et al., 2014).

413 In our current study we observed positive and negative betas for color and emotion pwPEs, respectively,  
414 which might reflect complementary neural mechanisms for predictive processing across distinct features.  
415 The notion that predictive coding across features can be mediated by qualitatively different mechanisms  
416 (Aukstulewicz et al., 2018) suggests domain-specific predictive signaling. As fMRI does not allow to  
417 measure detailed neural firing but rather represents the bulk signal of excitation and inhibition within a  
418 region (Logothetis, 2008), we cannot draw conclusions about specific mechanisms that could lead to this  
419 difference in the PE signal.

420 In summary, our findings demonstrate that the same physical stimulus can elicits separate feature-specific  
421 pwPE/prediction responses, depending on distinct predictions about its various attributes. This is in  
422 agreement with PC theories of perception. In future extensions of this work, models of effective  
423 connectivity could examine the signaling of pwPEs/predictions in cortical networks as postulated by PC.

## 424 References

- 425 Adamaszek M, D'Agata F, Ferrucci R, Habas C, Keulen S, Kirkby KC, Leggio M, Mariën P, Molinari M, Moulton E, Orsi L, Van  
426 Overwalle F, Papadelis C, Priori A, Sacchetti B, Schutter DJ, Styliadis C, Verhoeven J (2017) Consensus Paper:  
427 Cerebellum and Emotion. *Cerebellum* 16:552-576. <https://doi.org/10.1007/s12311-016-0815-8>
- 428 Adams RA, Napier G, Roiser JP, Mathys C, Gilleen J (2018) Attractor-like dynamics in belief updating in schizophrenia. *J Neurosci*  
429 doi: 10.1523/JNEUROSCI.3163-17.2018.
- 430 Astikainen P, Hietanen JK (2009) Event-related potentials to task-irrelevant changes in facial expressions. *Behav Brain Funct*  
431 5:30.
- 432 Astikainen P, Cong F, Ristaniemi T, Hietanen JK (2013) Event-related potentials to unattended changes in facial expressions:  
433 detection of regularity violations or encoding of emotions? *Front Hum Neurosci* 7:557.
- 434 Auzztulewicz R, Friston K (2015) Attentional Enhancement of Auditory Mismatch Responses: a DCM/MEG Study. *Cereb Cortex*  
435 25:4273-4283.
- 436 Auzztulewicz R, Friston K (2016) Repetition suppression and its contextual determinants in predictive coding. *Cortex* 80:125-  
437 40. doi: 10.1016/j.cortex.2015.11.024.
- 438 Auzztulewicz R, Friston KJ, Nobre AC (2017) Task relevance modulates the behavioural and neural effects of sensory  
439 predictions. *PLoS Biol* 15(12): e2003143. doi.org/10.1371/journal.pbio.2003143
- 440 Auzztulewicz R, Schwiedrzik CM, Thesen T, Doyle W, Devinsky O, Nobre AC, Schroeder CE, Friston KJ, Melloni L (2018) Not All  
441 Predictions Are Equal: "What" and "When" Predictions Modulate Activity in Auditory Cortex through Different  
442 Mechanisms. *J Neurosci*. 38(40):8680-8693. doi: 10.1523/JNEUROSCI.0369-18.2018.
- 443 Barbur JL, Spang K (2008) Colour constancy and conscious perception of changes of illuminant. *Neuropsychologia* 46:853-863.
- 444 Bartels A, Zeki S (2000) The architecture of the colour centre in the human visual brain: new results and a review. *Eur J Neurosci*  
445 12:172-193.
- 446 Bastiaansen JA, Thioux M, Keysers C (2009) Evidence for mirror systems in emotions. *Philos Trans R Soc Lond B Biol Sci*  
447 364:2391-2404.
- 448 Bogacz R (2017) A tutorial on the free-energy framework for modelling perception and learning. *J Math Psychol*. 76(Pt B):198-  
449 211.
- 450 Brewer AA, Liu J, Wade AR, Wandell BA (2005) Visual field maps and stimulus selectivity in human ventral occipital cortex. *Nat*  
451 *Neurosci* 8:1102-1109.
- 452 Brouwer GJ, Heeger DJ (2009) Decoding and reconstructing color from responses in human visual cortex. *J Neurosci* 29:13992-  
453 14003.
- 454 Clark A (2015) Surfing Uncertainty: Prediction, Action, and the Embodied Mind. In. Oxford: Oxford University Press.
- 455 Costa-Faidella J, Baldeweg T, Grimm S, Escera C (2011) Interactions between "what" and "when" in the auditory system:  
456 temporal predictability enhances repetition suppression. *J Neurosci* 31:18590-18597.
- 457 Csukly G, Stefanics G, Komlósi S, Czigler I, Bitter I, Czobor P (2013) Emotion-related visual mismatch responses in schizophrenia:  
458 Impairments and correlations with emotion recognition. *PLoS ONE*, 8(10): e75444.
- 459 den Ouden HE, Kok P, de Lange FP (2012) How prediction errors shape perception, attention, and motivation. *Front Psychol*.  
460 3:548. doi: 10.3389/fpsyg.2012.00548.
- 461 Diaconescu AO, Mathys C, Weber LAE, Kasper L, Mauer J, Stephan KE (2017) Hierarchical prediction errors in midbrain and  
462 septum during social learning. *Soc Cogn Affect Neurosci* 12(4):618-634. doi: 10.1093/scan/nsw171.
- 463 Dürschmid S, Edwards E, Reichert C, Dewar C, Hinrichs H, Heinze HJ, Kirsch HE, Dalal SS, Deouell LY, Knight RT (2016) Hierarchy  
464 of prediction errors for auditory events in human temporal and frontal cortex. *Proc Natl Acad Sci U S A* 113:6755-  
465 6760.
- 466 E KH, Chen SH, Ho MH, Desmond JE (2014) A meta-analysis of cerebellar contributions to higher cognition from PET and fMRI  
467 studies. *Hum Brain Mapp* 35:593-615.
- 468 Egnér T, Monti JM, Summerfield C (2010) Expectation and surprise determine neural population responses in the ventral visual  
469 stream. *J Neurosci* 30:16601-16608.
- 470 Ehinger BV, Hausser K, Ossandon JP, König P (2017) Humans treat unreliable filled-in percepts as more real than veridical ones.  
471 *Elife* 6:ARTN e21761.
- 472 Eickhoff SB, Stephan KE, Mohlberg H, Grefkes C, Fink GR, Amunts K, Zilles K (2005) A new SPM toolbox for combining  
473 probabilistic cytoarchitectonic maps and functional imaging data. *Neuroimage* 25:1325-1335.
- 474 Farkas K, Stefanics G, Marosi C, Csukly G (2015) Elementary sensory deficits in schizophrenia indexed by impaired visual  
475 mismatch negativity. *Schizophrenia Research* 166: 164-170.
- 476 Feldman H, Friston KJ (2010) Attention, uncertainty, and free-energy. *Front Hum Neurosci*. 4:215. doi:  
477 10.3389/fnhum.2010.00215.
- 478 Flandin G, Friston KJ (2017) Analysis of family-wise error rates in statistical parametric mapping using random field theory. *Hum*  
479 *Brain Mapp* doi: 10.1002/hbm.23839
- 480 Fridlund AJ (1994) Human facial expression: An evolutionary view. San Diego, CA: Academic Press.



- 481 Friston K (2002) Functional integration and inference in the brain. *Progress in Neurobiology* 68:113–143.
- 482 Friston K (2005) A theory of cortical responses. *Philos Trans R Soc Lond B Biol Sci* 360:815–836.
- 483 Friston K (2009) The free-energy principle: a rough guide to the brain? *Trends Cogn. Sci.* 13(7):293–301. doi:  
484 10.1016/j.tics.2009.04.005.
- 485 Friston K (2010) The free-energy principle: a unified brain theory? *Nat Rev Neurosci* 11:127–138.
- 486 Friston KJ, Ashburner J, Kiebel SJ, Nichols TE, Penny WD, eds. (2007) *Statistical Parametric Mapping: The Analysis of Functional*  
487 *Brain Images*. Academic Press.
- 488 Friston K, Adams R, Montague R (2012a) What is value-accumulated reward or evidence? *Front Neurobot* 6:11.
- 489 Friston K, Adams RA, Perrinet L, Breakspear M (2012b) Perceptions as hypotheses: saccades as experiments. *Front Psychol*  
490 3:151.
- 491 Frith C (2009) Role of facial expressions in social interactions. *Philos Trans R Soc Lond B Biol Sci* 364:3453–3458.
- 492 Fujimura T, Okanoya K (2013) Event-related potentials elicited by pre-attentive emotional changes in temporal context. *PLoS*  
493 *One* 8:e63703.
- 494 Fusar-Poli P, Placentino A, Carletti F, Landi P, Allen P, Surguladze S, Benedetti F, Abbamonte M, Gasparotti R, Barale F, Perez J,  
495 McGuire P, Politi P (2009) Functional atlas of emotional faces processing: a voxel-based meta-analysis of 105  
496 functional magnetic resonance imaging studies. *J Psychiatry Neurosci* 34:418–432.
- 497 Garrido MI, Friston KJ, Kiebel SJ, Stephan KE, Baldeweg T, Kilner JM (2008) The functional anatomy of the MMN: a DCM study of  
498 the roving paradigm. *Neuroimage* 42:936–944.
- 499 Glover GH, Li TQ, Ress D (2000) Image-based method for retrospective correction of physiological motion effects in fMRI:  
500 RETROICOR. *Magn Reson Med* 44:162–167.
- 501 Gordon N, Koenig-Robert R, Tsuchiya N, van Boxtel JJ, Hohwy J (2017) Neural markers of predictive coding under perceptual  
502 uncertainty revealed with Hierarchical Frequency Tagging. *Elife* 6.
- 503 Grotheer M, Kovács G (2015) The relationship between stimulus repetitions and fulfilled expectations. *Neuropsychologia*.  
504 67:175–82. doi: 10.1016/j.neuropsychologia.2014.12.017.
- 505 Haenschel C, Vernon DJ, Dwivedi P, Gruzelier JH, Baldeweg T (2005) Event-related brain potential correlates of human auditory  
506 sensory memory-trace formation. *J Neurosci* 25:10494–10501.
- 507 Hubel DH, Wiesel TN (1965) Receptive Fields and Functional Architecture in Two Nonstriate Visual Areas (18 and 19) of the Cat.  
508 *J Neurophysiol* 28:229–289.
- 509 Jiang J, Summerfield C, Eger T (2013) Attention sharpens the distinction between expected and unexpected percepts in the  
510 visual brain. *J Neurosci.* 33(47):18438–18447. doi: 10.1523/JNEUROSCI.3308-13.2013.
- 511 Jiang J, Summerfield C, Eger T (2016) Visual Prediction Error Spreads Across Object Features in Human Visual Cortex. *J*  
512 *Neurosci* 36:12746–12763.
- 513 Kasper L, Bollmann S, Diaconescu AO, Hutton C, Heinzle J, Iglesias S, Hauser TU, Sebold M, Manjaly ZM, Pruessmann KP,  
514 Stephan KE (2017) The PhysIO Toolbox for Modeling Physiological Noise in fMRI Data. *J Neurosci Methods* 276:56–72.
- 515 Katthagen T, Mathys C, Deserno L, Walter H, Kathmann N, Heinz A, Schlagenhauf F (2018) Modeling subjective relevance in  
516 schizophrenia and its relation to aberrant salience. *PLoS Comput Biol* 14(8): e1006319.  
517 <https://doi.org/10.1371/journal.pcbi.1006319>
- 518 Kimura M, Kondo H, Ohira H, Schroger E (2012) Unintentional temporal context-based prediction of emotional faces: an  
519 electrophysiological study. *Cereb Cortex* 22:1774–1785.
- 520 Kok P, Rahnev D, Jehee JF, Lau HC, de Lange FP (2012) Attention reverses the effect of prediction in silencing sensory signals.  
521 *Cereb Cortex* 22:2197–2206.
- 522 Krassanakis V, Filippakopoulou V, Nakos B (2014) EyeMMV toolbox: An eye movement post-analysis tool based on a two-step  
523 spatial dispersion threshold for fixation identification. *J Eye Movement Res* 7.
- 524 Kreegipuu K, Kuldkepp N, Sibolt O, Toom M, Allik J, Näätänen R (2013) vMMN for schematic faces: automatic detection of  
525 change in emotional expression. *Front Hum Neurosci* 7:714.
- 526 Kremlacek J, Kreegipuu K, Tales A, Astikainen P, Poldver N, Naatanen R, Stefanics G (2016) Visual mismatch negativity (vMMN):  
527 A review and meta-analysis of studies in psychiatric and neurological disorders. *Cortex* 80:76–112.
- 528 Kuldkepp N, Kreegipuu K, Raidvee A, Näätänen R, Allik J (2013) Unattended and attended visual change detection of motion as  
529 indexed by event-related potentials and its behavioral correlates. *Front Hum Neurosci* 7:476. doi:  
530 10.3389/fnhum.2013.00476.
- 531 Lafer-Sousa R, Conway BR, Kanwisher NG (2016) Color-Biased Regions of the Ventral Visual Pathway Lie between Face- and  
532 Place-Selective Regions in Humans, as in Macaques. *J Neurosci* 36:1682–1697.
- 533 Langner O, Dotsch R, Bijlstra G, Wigboldus DHJ, Hawk ST, van Knippenberg A (2010) Presentation and validation of the Radboud  
534 Faces Database. *Cognition & Emotion* 24:1377–1388.
- 535 Lawson RP, Mathys C, Rees G (2017) Adults with autism overestimate the volatility of the sensory environment. *Nat Neurosci*  
536 20:1293–1299.
- 537 Lee TS, Mumford D (2003) Hierarchical Bayesian inference in the visual cortex. *J Opt Soc Am* 20.

- 538 Li X, Lu Y, Sun G, Gao L, Zhao L (2012) Visual mismatch negativity elicited by facial expressions: new evidence from the  
539 equiprobable paradigm. *Behav Brain Funct* 8:7.
- 540 Lochmann T, Ernst UA, Deneve S (2012) Perceptual inference predicts contextual modulations of sensory responses. *J Neurosci*  
541 32:4179-4195.
- 542 Logothetis NK (2008) What we can do and what we cannot do with fMRI. *Nature* 453(7197):869-878. doi:  
543 10.1038/nature06976.
- 544 Mesulam MM (1998) From sensation to cognition. *Brain* 121 ( Pt 6):1013-1052.
- 545 Moran RJ, Campo P, Symmonds M, Stephan KE, Dolan RJ, Friston KJ (2013) Free energy, precision and learning: the role of  
546 cholinergic neuromodulation. *J Neurosci* 33:8227-8236.
- 547 Müller D, Widmann A, Schröger E (2013) Object-related regularities are processed automatically: evidence from the visual  
548 mismatch negativity. *Front Hum Neurosci*. 7:259. doi:10.3389/fnhum.2013.00259
- 549 Müller D, Winkler I, Roeber U, Schaffer S, Czigler I, Schröger E (2010) Visual object representations can be formed outside the  
550 focus of voluntary attention: evidence from event-related brain potentials. *J Cogn Neurosci* 22:1179-1188.
- 551 Parr T, Friston KJ (2018) The Anatomy of Inference: Generative Models and Brain Structure. *Front Comput Neurosci*. 12:90. doi:  
552 10.3389/fncom.2018.00090.
- 553 Powers AR, Mathys C, Corlett PR (2017) Pavlovian conditioning-induced hallucinations result from overweighting of perceptual  
554 priors. *Science* 357:596-600.
- 555 Rao RP, Ballard DH (1999) Predictive coding in the visual cortex: a functional interpretation of some extra-classical receptive-  
556 field effects. *Nat Neurosci* 2:79-87.
- 557 Riesenhuber M, Poggio T (2000) Models of object recognition. *Nat Neurosci* 3 Suppl:1199-1204.
- 558 Schurz M, Radua J, Aichhorn M, Richlan F, Perner J (2014) Fractionating theory of mind: a meta-analysis of functional brain  
559 imaging studies. *Neurosci Biobehav Rev* 42:9-34.
- 560 Schwartenbeck P, FitzGerald TH, Mathys C, Dolan R, Friston K (2015) The Dopaminergic Midbrain Encodes the Expected  
561 Certainty about Desired Outcomes. *Cereb Cortex* 25:3434-3445.
- 562 Schwiedrzik CM, Freiwald WA (2017) High-Level Prediction Signals in a Low-Level Area of the Macaque Face-Processing  
563 Hierarchy. *Neuron* 96:89-97 e84.
- 564 Sedley W, Gander PE, Kumar S, Kovach CK, Oya H, Kawasaki H, Howard MA, Griffiths TD (2016) Neural signatures of perceptual  
565 inference. *Elife* 5:e11476.
- 566 Smith FW, Muckli L (2010) Nonstimulated early visual areas carry information about surrounding context. *P Natl Acad Sci USA*  
567 107:20099-20103.
- 568 Solomon SG, Kohn A (2014) Moving sensory adaptation beyond suppressive effects in single neurons. *Curr Biol*. 24(20):R1012-  
569 22. doi: 10.1016/j.cub.2014.09.001.
- 570 Solomon SG, Lennie P (2007) The machinery of colour vision. *Nat Rev Neurosci* 8:276-286.
- 571 Stefanics G, Kimura M, Czigler I (2011) Visual mismatch negativity reveals automatic detection of sequential regularity violation.  
572 *Front Hum Neurosci* 5:46.
- 573 Stefanics G, Kremlacek J, Czigler I (2014) Visual mismatch negativity: a predictive coding view. *Front Hum Neurosci* 8:666.
- 574 Stefanics G, Kremlacek J, Czigler I (2016) Mismatch negativity and neural adaptation: Two sides of the same coin. *Response:*  
575 *Commentary: Visual mismatch negativity: a predictive coding view. Front Hum Neurosci* 10:13. doi:  
576 10.3389/fnhum.2016.00013
- 577 Stefanics G, Heinzle J, Horvath AA, Stephan KE (2018a) Visual Mismatch and Predictive Coding: A Computational Single-Trial ERP  
578 Study. *J Neurosci* 38:4020-4030.
- 579 Stefanics G, Heinzle J, Czigler I, Valentini E, Stephan KE (2018b) Timing of repetition suppression of event-related potentials to  
580 unattended objects. *Eur J Neurosci* doi:10.1111/ejn.13972
- 581 Stefanics G, Csukly G, Komlosi S, Czobor P, Czigler I (2012) Processing of unattended facial emotions: a visual mismatch  
582 negativity study. *Neuroimage* 59:3042-3049.
- 583 Summerfield C, de Lange FP (2014) Expectation in perceptual decision making: neural and computational mechanisms. *Nat Rev*  
584 *Neurosci*. 15(11):745-56. doi: 10.1038/nrn3838.
- 585 Treisman AM, Gelade G (1980) A feature-integration theory of attention. *Cogn Psychol* 12:97-136.
- 586 Susac A, Ilmoniemi RJ, Pihko E, Supek S (2004) Neurodynamic studies on emotional and inverted faces in an oddball paradigm.  
587 *Brain Topogr* 16:265-268.
- 588 Vossel S, Mathys C, Daunizeau J, Bauer M, Driver J, Friston KJ, Stephan KE (2014) Spatial Attention, Precision, and Bayesian  
589 Inference: A Study of Saccadic Response Speed. *Cereb Cortex*. 24(6):1436-50. doi: 10.1093/cercor/bhs418.
- 590 Vossel S, Mathys C, Stephan KE, Friston KJ (2015) Cortical Coupling Reflects Bayesian Belief Updating in the Deployment of  
591 Spatial Attention. *J Neurosci* 35:11532-11542.
- 592 Wacongne C, Labyt E, van Wassenhove V, Bekinschtein T, Naccache L, Dehaene S (2011) Evidence for a hierarchy of predictions  
593 and prediction errors in human cortex. *Proceedings of the National Academy of Sciences of the United States of*  
594 *America* 108:20754-20759.

595 Willenbockel V, Sadr J, Fiset D, Horne GO, Gosselin F, Tanaka JW (2010) Controlling low-level image properties: the SHINE  
596 toolbox. *Behav Res Methods* 42:671-684.  
597 Woo CW, Krishnan A, Wager TD (2014) Cluster-extent based thresholding in fMRI analyses: pitfalls and recommendations.  
598 *Neuroimage* 91:412-419.  
599 Wyart V, Nobre AC, Summerfield C (2012) Dissociable prior influences of signal probability and relevance on visual contrast  
600 sensitivity. *Proc Natl Acad Sci USA*. 109(9):3593-8. doi: 10.1073/pnas.1120118109.  
601 Xu QR, Ruohonen EM, Ye CX, Li XQ, Kreegipuu K, Stefanics G, Luo WB, Astikainen P (2018) Automatic Processing of Changes in  
602 Facial Emotions in Dysphoria: A Magnetoencephalography Study. *Frontiers in Human Neuroscience* 12:186.  
603

604 **Table 1.**

| <b>Contrast and Cluster</b>        | <b>Structure</b>             | <b>Cytoarchitectonic area</b>  | <b>Cluster max. (MNI)</b> |            |            |
|------------------------------------|------------------------------|--------------------------------|---------------------------|------------|------------|
| <b>Main effects of color PEs</b>   |                              |                                |                           |            |            |
| <i>Cluster 1 (326 voxels)</i>      | <b>L Fusiform Gyrus</b>      | <b>Area FG3</b>                | <b>-30</b>                | <b>-58</b> | <b>-14</b> |
|                                    | L Fusiform Gyrus             | Area FG1                       | -28                       | -70        | -8         |
|                                    | L Fusiform Gyrus             | Area FG3                       | -30                       | -54        | -10        |
| <i>Cluster 2 (212 voxels)</i>      | <b>R Fusiform Gyrus</b>      | <b>Area FG3</b>                | <b>32</b>                 | <b>-46</b> | <b>-20</b> |
|                                    | R Fusiform Gyrus             | Area FG3                       | 30                        | -46        | -12        |
|                                    | R Fusiform Gyrus             | n.a.                           | 26                        | -54        | -12        |
| <b>Main effects of emotion PEs</b> |                              |                                |                           |            |            |
| <i>Cluster 1 (1417 voxels)</i>     | <b>R Cuneus</b>              | <b>Area hOc3d [V3d]</b>        | <b>10</b>                 | <b>-88</b> | <b>26</b>  |
|                                    | L Lingual Gyrus              | Area hOc1 [V1]                 | -2                        | -78        | -8         |
|                                    | Cerebellar Vermis (4/5)      | n.a.                           | -2                        | -64        | 0          |
|                                    | R Lingual Gyrus              | Area hOc3v [V3v]               | 14                        | -66        | -2         |
|                                    | L Cerebellum (Crus 1)        | Lobule VIIa crus I (Hem)       | -12                       | -88        | -22        |
|                                    | R Calcarine Gyrus            | Area hOc2 [V2]                 | 10                        | -94        | 8          |
|                                    | n.a.                         | Area hOc1 [V1]                 | 6                         | -82        | -14        |
|                                    | R Cuneus                     | Area hOc2 [V2]                 | 8                         | -94        | 14         |
|                                    | L Lingual Gyrus              | Area hOc1 [V1]                 | 2                         | -72        | 6          |
|                                    | R Calcarine Gyrus            | Area hOc1 [V1]                 | 18                        | -68        | 10         |
|                                    | R Lingual Gyrus              | Area hOc3v [V3v]               | 18                        | -86        | -14        |
| <i>Cluster 2 (554 voxels)</i>      | <b>L Cerebellum (Crus 1)</b> | <b>Lobule VIIa crusI (Hem)</b> | <b>-40</b>                | <b>-50</b> | <b>-32</b> |
|                                    | L Cerebellum (VI)            | Lobule VI (Hem)                | -30                       | -64        | -24        |
|                                    | L Cerebellum (Crus 1)        | Lobule VIIa crusI (Hem)        | -42                       | -66        | -30        |
|                                    | L Cerebellum (VI)            | Lobule VI (Hem)                | -36                       | -54        | -28        |
|                                    | L Cerebellum (VI)            | Lobule VI (Hem)                | -24                       | -74        | -20        |
|                                    | L Cerebellum (Crus 1)        | Lobule VIIa crusI (Hem)        | -20                       | -80        | -24        |
|                                    | L Cerebellum (Crus 1)        | Lobule VIIa crusI (Hem)        | -22                       | -80        | -32        |
|                                    | L Cerebellum (Crus 1)        | Lobule VIIa crusI (Hem)        | -26                       | -80        | -32        |
| <i>Cluster 3 (511 voxels)</i>      | <b>R SupraMarginal Gyrus</b> | <b>Area PF (IPL)</b>           | <b>58</b>                 | <b>-38</b> | <b>26</b>  |
|                                    | R Middle Temporal Gyrus      | n.a.                           | 56                        | -40        | 6          |
|                                    | R Middle Temporal Gyrus      | n.a.                           | 58                        | -42        | 8          |
|                                    | R SupraMarginal Gyrus        | Area PFm (IPL)                 | 64                        | -44        | 26         |
|                                    | R Superior Temporal Gyrus    | Area PF (IPL)                  | 66                        | -34        | 10         |
|                                    | R Superior Temporal Gyrus    | Area PFm (IPL)                 | 60                        | -42        | 20         |
|                                    | R Middle Temporal Gyrus      | n.a.                           | 52                        | -48        | 16         |
|                                    | R Superior Temporal Gyrus    | n.a.                           | 54                        | -44        | 14         |
|                                    | R SupraMarginal Gyrus        | Area Pft (IPL)                 | 54                        | -24        | 28         |
|                                    | R SupraMarginal Gyrus        | n.a.                           | 48                        | -42        | 32         |
|                                    | R Superior Temporal Gyrus    | n.a.                           | 62                        | -38        | 12         |
| <i>Cluster 4 (380 voxels)</i>      | <b>L Precuneus</b>           | <b>n.a.</b>                    | <b>-2</b>                 | <b>-54</b> | <b>54</b>  |
|                                    | L Precuneus                  | n.a.                           | 0                         | -56        | 60         |
|                                    | R Precuneus                  | Area 5M (SPL)                  | 2                         | -50        | 58         |
|                                    | L Precuneus                  | n.a.                           | -2                        | -54        | 48         |
|                                    | R Precuneus                  | n.a.                           | 10                        | -60        | 42         |
|                                    | R Precuneus                  | n.a.                           | 8                         | -58        | 50         |
|                                    | L Midcingulate cortex        | Area 5M (SPL)                  | 0                         | -38        | 52         |
|                                    | L Midcingulate cortex        | n.a.                           | -2                        | -38        | 44         |
|                                    | L Midcingulate cortex        | n.a.                           | -2                        | -44        | 42         |
| <i>Cluster 5 (178 voxels)</i>      | <b>R Cerebellum (VI)</b>     | <b>Lobule VI (Hem)</b>         | <b>34</b>                 | <b>-46</b> | <b>-30</b> |
|                                    | R Cerebellum (Crus 1)        | Lobule VIIa crus I (Hem)       | 44                        | -56        | -28        |
|                                    | R Cerebellum (Crus 1)        | Lobule VIIa crus I (Hem)       | 40                        | -54        | -30        |
|                                    | R Cerebellum (Crus 1)        | Lobule VIIa crus I (Hem)       | 38                        | -52        | -32        |
|                                    | R Cerebellum (Crus 1)        | Lobule VIIa crus I (Hem)       | 48                        | -60        | -32        |
|                                    | R Cerebellum (Crus 1)*       | Area FG2                       | 46                        | -62        | -26        |
| <i>Cluster 6 (162 voxels)</i>      | <b>R Cerebellum (Crus 1)</b> | <b>Lobule VIIa crusI (Hem)</b> | <b>34</b>                 | <b>-80</b> | <b>-28</b> |
|                                    | R Cerebellum (Crus 1)        | Lobule VIIa crusI (Hem)        | 28                        | -76        | -34        |
|                                    | R Cerebellum (VI)            | Lobule VI (Hem)                | 32                        | -72        | -24        |
|                                    | R Cerebellum (VI)            | Lobule VI (Hem)                | 36                        | -64        | -26        |
|                                    | R Cerebellum (Crus 1)        | n.a.                           | 40                        | -76        | -22        |
| <i>Cluster 7 (130 voxels)</i>      | L Thalamus***                | Thalamus proper                | -2                        | -4         | 8          |

|                                            | <b>R Thalamus</b>                   | <b>Thal: Temporal</b>             | <b>8</b>   | <b>-22</b> | <b>10</b>  |
|--------------------------------------------|-------------------------------------|-----------------------------------|------------|------------|------------|
|                                            | R Thalamus                          | Thal: Temporal                    | 14         | -28        | 10         |
| <i>Cluster 8 (120 voxels)</i>              | <b>R Posterior-Medial Frontal**</b> | <b>Supplementary motor cortex</b> | <b>6</b>   | <b>2</b>   | <b>58</b>  |
|                                            | R Posterior-Medial Frontal**        | Supplementary motor cortex        | 8          | 12         | 58         |
|                                            | R Posterior-Medial Frontal          | n.a.                              | 10         | 14         | 62         |
| <i>Cluster 9 (107 voxels)</i>              | n.a.                                | n.a.                              | 4          | -36        | 2          |
|                                            | Cerebellar Vermis (4/5)             | n.a.                              | 4          | -46        | 4          |
|                                            | n.a.                                | n.a.                              | -2         | -36        | 8          |
| <i>Cluster 10 (79 voxels)</i>              | <b>R Lingual Gyrus</b>              | <b>n.a.</b>                       | <b>14</b>  | <b>-48</b> | <b>-6</b>  |
|                                            | R Lingual Gyrus                     | n.a.                              | 18         | -52        | -6         |
|                                            | R Lingual Gyrus                     | n.a.                              | 22         | -48        | -8         |
|                                            | R Fusiform Gyrus                    | n.a.                              | 22         | -46        | -12        |
|                                            |                                     |                                   |            |            |            |
| <b>Main effects of emotion PREDICTIONS</b> |                                     |                                   |            |            |            |
| <i>Cluster 1 (1500 voxels)</i>             | <b>R Fusiform Gyrus</b>             | <b>Area hOc4v [V4(v)]</b>         | <b>24</b>  | <b>-64</b> | <b>-10</b> |
|                                            | R Lingual Gyrus                     | Area hOc3v [V3v]                  | 22         | -74        | -10        |
|                                            | R Lingual Gyrus                     | n.a.                              | 22         | -56        | -8         |
|                                            | R Fusiform Gyrus                    | Area FG3                          | 32         | -54        | -14        |
|                                            | R Calcarine Gyrus                   | Area hOc1 [V1]                    | 12         | -76        | 10         |
|                                            | R Lingual Gyrus                     | Area hOc1 [V1]                    | 24         | -56        | -2         |
|                                            | R Calcarine Gyrus                   | Area hOc1 [V1]                    | 20         | -72        | 8          |
|                                            | L Calcarine Gyrus                   | Area hOc2 [V2]                    | -16        | -68        | 8          |
|                                            | R Lingual Gyrus                     | n.a.                              | 24         | -46        | -10        |
|                                            | R Lingual Gyrus                     | Area hOc2 [V2]                    | 10         | -78        | -2         |
|                                            | L Calcarine Gyrus                   | Area hOc1 [V1]                    | -10        | -66        | 8          |
| <i>Cluster 2 (515 voxels)</i>              | <b>L Fusiform Gyrus</b>             | <b>Area FG1</b>                   | <b>-24</b> | <b>-62</b> | <b>-14</b> |
|                                            | L Lingual Gyrus                     | n.a.                              | -22        | -48        | -8         |
|                                            | L Lingual Gyrus                     | n.a.                              | -22        | -52        | -8         |
|                                            | L Lingual Gyrus                     | n.a.                              | -20        | -58        | -8         |
|                                            | L Fusiform Gyrus                    | Area FG1                          | -28        | -72        | -12        |
|                                            | L Fusiform Gyrus                    | Area hOc4v [V4(v)]                | -22        | -72        | -14        |
|                                            | L Fusiform Gyrus                    | Area hOc4v [V4(v)]                | -30        | -76        | -12        |
|                                            | L Lingual Gyrus                     | Area hOc4v [V4(v)]                | -18        | -70        | -10        |
| <i>Cluster 3 (147 voxels)</i>              | <b>R Superior Temporal Gyrus</b>    | <b>n.a.</b>                       | <b>54</b>  | <b>-44</b> | <b>18</b>  |
|                                            | R Middle Temporal Gyrus             | n.a.                              | 62         | -40        | 2          |
|                                            | R Middle Temporal Gyrus             | n.a.                              | 58         | -42        | 8          |
|                                            | R SupraMarginal Gyrus               | Area PFcm (IPL)                   | 54         | -38        | 26         |
|                                            | R SupraMarginal Gyrus               | Area PF (IPL)                     | 66         | -38        | 30         |

605

606 **Table 1.** Assignment of activations to anatomical and cytoarchitectonic regions (Anatomy Toolbox, v2.2c).  
607 In order to characterize the anatomical locations of the cluster we report maxima within the clusters and  
608 their assignment to anatomical regions. If a maximum lies within a particular region, this means that the  
609 cluster extends into that anatomical region, but does not imply that the entire region is activated or that  
610 the entire cluster lies within that anatomical region. Whole brain analyses on the cluster level  $p < 0.05$   
611 (FWE-corrected) with a cluster defining threshold of  $p < 0.001$ . Contrast estimates from structures in bold  
612 font are plotted in Figures 2-4. n.a.: these maxima were not assigned to any region. \*The anatomy toolbox  
613 labelled this maximum as Cerebellum but assigned it to the fusiform area FG2. \*\*The anatomy toolbox  
614 labelled this maximum as Posterior-Medial Frontal cortex but did not assign it. The anatomical label was  
615 corrected to Supplementary motor cortex based on Neuromorphometrics labelling in SPM. \*\*\*The  
616 anatomy toolbox did not label this maximum. The anatomical label of left Thalamus was added based on  
617 Neuromorphometrics labelling in SPM.

618
